# Supplementary material
Source: publisher figshare collection journal article supplement (https://acs.figshare.com/ndownloader/files/24168792)
Supplement: Supplementary file 1 [file 24168792]

## SUPPORTING INFORMATION

### Effect of PEG-induced molecular crowding on the enzymatic activity and thermal stability of $\beta$ galactosidase from *Kluyveromyces lactis*.

Verónica Nolan §, Alejandro Colin §, Carolina Rodriguez, and María A. Perillo\*

<sup>a</sup>Universidad Nacional de Córdoba, Facultad de Ciencias Exactas, Físicas y Naturales. ICTA and Departamento de Química, Cátedra de Química Biológica. Av. Vélez Sársfield 1611, 5016 Córdoba, Argentina.

<sup>b</sup>CONICET-Universidad Nacional de Córdoba, Instituto de Investigaciones Biológicas y Tecnológicas (IIByT). Córdoba, Argentina.

\* Corresponding author mperillo@unc.edu.ar

§ These authors contributed equally.

#### CONTENTS (S1 to S6 refer to page numbers)

S 1 Title, authors, affiliations and description of Supporting Information content

S2. Experimental conditions for  $\beta$ -Gal activity measurement in the presence of PEG<sub>6000</sub>

S2. Effect of PEG<sub>6000</sub> on the spectroscopic characteristics of ONP

S2 Chemical stability of ONP in the presence of PEG<sub>6000</sub>

S3. Figure S1. Effect of PEG<sub>6000</sub> on the UV-vis absorbance spectrum of ONPx.

S3 Testing different inactivators of  $\beta$ -Gal to stop the chemical reaction

S4. Figure S2. Effect of the addition of NaOH on the  $\beta$ -Gal induced hydrolysis of ONPG.

S5. Effect of PEG<sub>6000</sub> on ONPG non-enzymatic hydrolysis and  $\beta$ -Gal inactivation treatment induced by NaOH.

S5 Table S1. Linear regression analysis of the time-dependent ONPG hydrolysis in the presence and absence of  $\beta$ -Gal using NaOH as inactivator.

S6 Optimal time and enzyme concentration determination

S7 Figure S3. Eadie-Hoftee analysis of *Kluyveromyces lactis* catalyzed reaction rate as a function of [ONPG]. Effect of PEG.

S8 Statistical analysis

S19. References

## Experimental conditions for $\beta$ -Gal activity measurement in the presence of PEG<sub>6000</sub>

### a) Effect of PEG<sub>6000</sub> on the spectroscopic characteristics of ONP.

Aqueous disolutions of *ortho*-nitro phenol (ONP) were prepared in the absence (PEG<sub>0</sub>) or in the presence of PEG<sub>6000</sub> at final concentrations ranging from 15 to 55 % w/v. The absorbance of the *ortho*-nitrophenoxide (ONPx) formed was determined, in a Beckman DU 700 (Fullerton, C. A.) spectrophotometer, at 420 nm ( $A_{420}$ ) or within the range 260-500 nm. In some experiments a temporal variation of the absorbance at 377 nm ( $A_{377}$ ) was registered.

### b) Chemical stability of ONP in the presence of PEG<sub>6000</sub>.

The hypothesis that PEG<sub>6000</sub> could have induced changes on the spectral behaviour of ONP was explored more deeply. The absorbance spectra of ONP was analysed at two extreme pH. Only at basic pH (a condition that resembles that of the enzymatic study) the typical peak at 420 nm was shown due to the presence of the dissociated species (*o*-nitrophenoxide, ONPx) (Fig.1a). In the presence of PEG<sub>6000</sub> and at an alkaline pH the maximum in the ONPx spectra exhibited a hyperchromic and bathochromic shift (Fig. 1b). Taking into account that the acid-base titration curves of ONP showed an increase in the intensity without a change in the position of the peak at 420 nm<sup>-1</sup>, it could be suggested that the presence of PEG<sub>6000</sub> not only favours the displacement of the ONP acid-base equilibrium towards the dissociated species (ONPx) but also may modify the polarity of the solution.

A straight line was fitted to the absorbance at 420 nm vs. PEG concentration data (Fig.1c). After transforming  $A_{420}$  into molar extinction coefficients values ( $\epsilon_{\text{ONP}}$ ), the regression equation (eq.S1) allowed calculate  $\epsilon_{\text{ONP}}$  at 420 nm at different PEG<sub>6000</sub> concentrations which varied from 4,809.6 M<sup>-1</sup> cm<sup>-1</sup> at 0% w/v PEG<sub>6000</sub> to 5,478.32 M<sup>-1</sup> cm<sup>-1</sup> at 45 % w/VvPEG<sub>6000</sub>).

$$\epsilon_0 = 4809.6 \text{ M}^{-1}\text{cm}^{-1} + 12.15\text{M}^{-1}\text{cm}^{-1} \times [\text{PEG}_{6000}] \quad [\text{S1}]$$

These values were used to estimate the correct amount of product obtained through the  $\beta$ -Gal enzymatic activity in the presence of PEG<sub>6000</sub>.

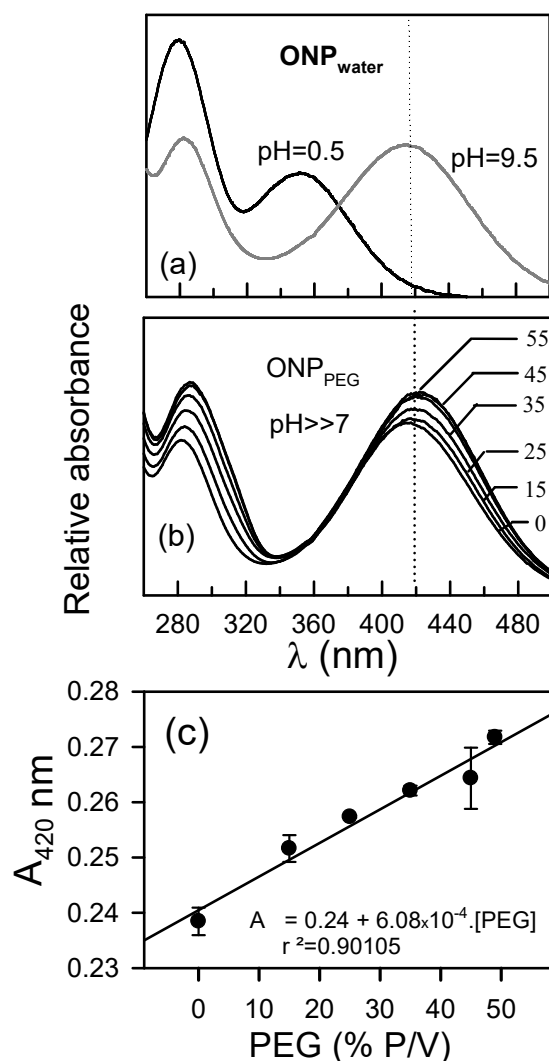

**Fig.S1. Effect of PEG<sub>6000</sub> on the UV-vis absorbance spectrum of ONPx.**

Absorbance spectra of ONPx in water at two extreme pH (a) and at alkaline pH in solutions containing PEG<sub>6000</sub> at the concentrations indicated (b).

In (c) a linear regression analysis of ONP absorbance at 420 nm vs. PEG concentration in an alkaline solution is shown. The regression equation is also depicted.

### c) Testing different inactivators of $\beta$ -Gal to stop the chemical reaction

In the present paper,  $\beta$ -Gal enzymatic activity in the absence and in the presence of different concentrations of PEG<sub>6000</sub> was measured using ONPG as substrate. Usually, those enzymatic assays where ONP is the reaction product use  $\text{Na}_2\text{CO}_3$  to stop the hydrolysis of the substrate (ONPG in the present case). At the same time, this procedure induces a sudden pH increase that displaces the ONP acid-base equilibrium towards the *ortho*-nitrophenoxide (ONPx), the dissociated form of ONP (Fig.1a). Different from ONP ( $\lambda_{\text{max}} \sim 352$  nm in water), ONPx has an absorption peak within the visible region ( $\lambda_{\text{max}} \sim 420$  nm in water) of the electromagnetic spectrum which allows its quantification based on spectrophotometric measurements avoiding the interference of other chemical species present in the reaction

mixture. However, in the presence of PEG<sub>6000</sub>, Na<sub>2</sub>CO<sub>3</sub> induces turbidity and a liquid-liquid phase separation, generating an interface where the enzyme and/or the product can be adsorbed<sup>2-3</sup>. Hence, instead of using Na<sub>2</sub>CO<sub>3</sub>, in the present paper we evaluated the efficacy of NaOH to inactivate the enzyme (Fig.2), after the incubation of ONPG in the presence of  $\beta$ -Gal, with or without 30% w/v PEG (PEG<sub>30</sub> and PEG<sub>0</sub>, respectively) and in optimal conditions for the enzyme activity (0.1 M sodium phosphate buffer pH 6.8 and 37 °C). After the addition of NaOH, the absorbance of ONP<sub>x</sub> at 377 nm ( $A_{377}$ ) was continuously recorded during 30 min to confirm the reaction arrest. Time zero was defined as the start of the inactivation procedure. Similar experiments were done using Na<sub>2</sub>CO<sub>3</sub> as inactivator. The choice of 377 nm as the detection wavelength was due to the fact that this is an isosbestic point in the family of ONP spectra at different PEG concentrations (Fig.1b) (this reflect an independence of ONP<sub>x</sub> absorbance values on [PEG] at this  $\lambda$ ).

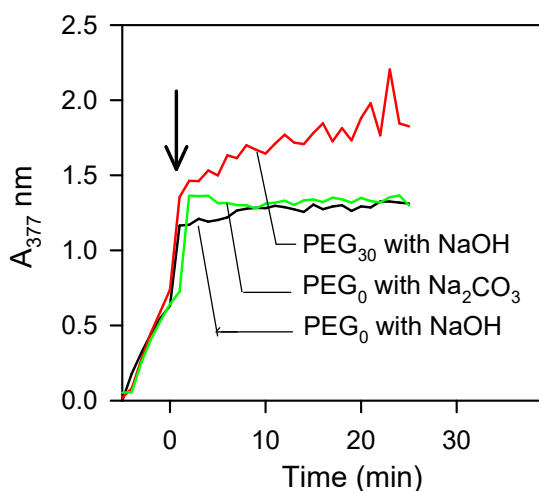

**Fig. S2 Effect of the addition of inactivator on the  $\beta$ -Gal induced hydrolysis of ONPG.**

The incubation system contained 8 mM [ONPG] and  $1.27 \times 10^{-3}$  mg/ml protein ( $\beta$ -Gal preparation) with or without 30% w/v PEG. After 10 min incubation at 37°C, the inactivator (0.35 M NaOH) was added to the incubation system at the time indicated by the arrow (time zero), in a 1:0.4 volume ratio with respect to the initial volume of incubation system. Due to its effect as phase separation inducer, 0.4 M Na<sub>2</sub>CO<sub>3</sub> was also tested as inactivator only in the absence of PEG.

$A_{420}$  vs. time data, starting at time zero, was submitted to a linear regression analysis. Table 1 shows the results obtained. Ordinates (“a”) are  $A_{420}$  values at the enzyme inactivation time, and represent the maximum amount of ONP<sub>x</sub> produced during the initial incubation period. Slopes (“b”) values close to zero reflect the efficacy of the inactivation procedure.

**d) Effect of PEG<sub>6000</sub> on ONPG non-enzymatic hydrolysis and  $\beta$ -Gal inactivation treatment induced by NaOH.**

Table S1. Linear regression analysis of the time-dependent ONPG hydrolysis in the presence and absence of  $\beta$ -Gal using NaOH as inactivator.

| [PEG <sub>6000</sub> ]<br>(% w/v) | Regression<br>parameter | Sample treatment   |                   |
|-----------------------------------|-------------------------|--------------------|-------------------|
|                                   |                         | - $\beta$ -Gal     | + $\beta$ -Gal    |
| 0                                 | b                       | 0.005 $\pm$ 0.0004 | 0.001 $\pm$ 0.004 |
|                                   | a                       | -0.004 $\pm$ 0.001 | 0.35 $\pm$ 0.12 # |
| 31                                | b                       | 0.008 $\pm$ 0.005  | 0.001 $\pm$ 0.009 |
|                                   | a                       | 0.18 $\pm$ 0.12 *  | 0.45 $\pm$ 0.20   |
| 45                                | b                       | 0.018 $\pm$ 0.008  | 0.014 $\pm$ 0.009 |
|                                   | a                       | 0.24 $\pm$ 0.17 *  | 0.39 $\pm$ 0.19   |

Samples (8 mM ONPG with or without  $\beta$ -Gal) were incubated at 37°C during 10 min. After that, 0.4M NaOH was added and A<sub>420</sub> was measured for 30 min. A linear equation was fitted to the experimental data. \*Significantly different with respect to the control without PEG<sub>6000</sub>; #significantly different with respect to the control without enzyme. b, slope; a, ordinate.

At 0% w/v PEG<sub>6000</sub>, in the presence or in the absence of  $\beta$ -Gal, slopes were not statistically different from zero. This was a clear indication that, in non-crowded media, this procedure was effective as an enzyme inactivator. As expected, the ordinate values (“a”) were zero in the absence of  $\beta$ -Gal and higher in samples containing  $\beta$ -Gal, due to the catalytic action of the enzyme on ONPG.

In the absence of the enzyme, the presence of PEG<sub>6000</sub>, mainly at the highest concentration assayed (45% w/v), induced an increase in the slope “b” values with respect to those without PEG<sub>6000</sub>, suggesting that a non-enzymatic PEG-dependent ONPG hydrolysis was occurring. In these samples, ordinates were also higher than those in the absence of PEG, strongly indicating that enzymatic ONPG hydrolysis was enhanced in crowded media, although effects on the spectroscopic behaviour of ONP could not be excluded.

### e) Optimal time and enzyme concentration determination

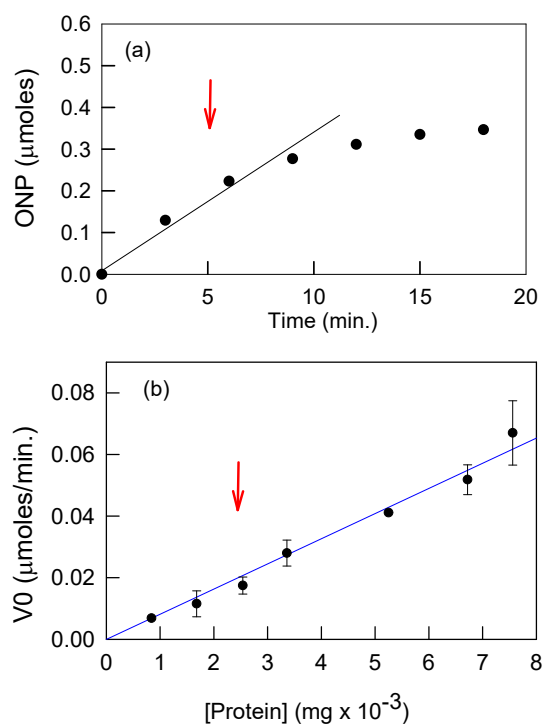

**Fig.S3 Determination of optimal conditions of *K.lactis*  $\beta$ -Gal catalyzed ONPG hydrolysis.** (a) Rate as a function of the incubation time in the presence of  $2.54 \times 10^{-3}$  mg/ml of enzyme and (b) Initial rate as a function of enzyme concentration measured at 5 min incubation time.

## Eadie-Hofstee analysis of *Kluyveromyces lactis* catalyzed reaction rate as a function of [ONPG]. Effect of PEG

The shapes of these plots ratify the michaelian-type kinetics in the absence and in the presence of 15 and 25% w/v PEG (Fig.S3a) and the cooperative kinetics in the presence of 35% w/v PEG (Fig.3b). For comparisons of line shapes and types of kinetics involved, see the article of Hutzler and Tracy, (2001) <sup>4</sup>.

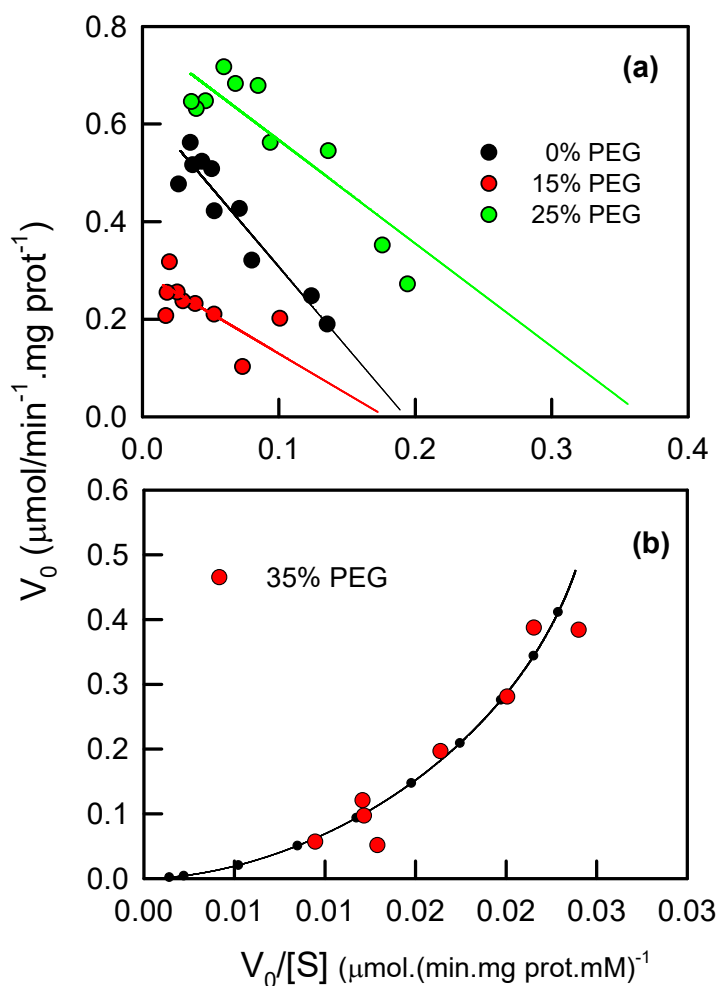

**Fig.S4. Eadie-Hofstee plots.**

Data are the same shown in rate as a function of ONPG concentration depicted in Fig.1. a) Straight lines were fitted to data in the absence (●) and in the presence of 15% (●) and 25% PEG (●) as expected from Michaelis–Menten hyperbolic-type kinetics. Lines correspond to the linear regressions. ANOVA produced  $p=0.003$ ,  $0.001$  y  $0.067$ , respectively.

b) This Eadie-Hofstee plot has the shape expected from a sigmoidal kinetics. Red dots correspond to experimental points. Small black dots are calculated values.

**Figure 2.** Effect of PEG<sub>6000</sub> on the thermal stability of  $\beta$ -Gal.**STATISTICAL ANALYSIS (ANOVA + TEST DE TUKEY) PARA “for raw data”**

All Pairwise Multiple Comparison Procedures (Tukey Test):

Comparisons for factor: **temp within 0%PEG**

| Comparison               | Diff of Means | p        | q            | P            | P<0.050   |
|--------------------------|---------------|----------|--------------|--------------|-----------|
| 20.000 vs. 50.000        | 2.044         | 5        | 24.864       | <0.001       | Yes       |
| 20.000 vs. 45.000        | 1.998         | 5        | 24.302       | <0.001       | Yes       |
| 20.000 vs. 40.000        | 1.337         | 5        | 16.270       | <0.001       | Yes       |
| 20.000 vs. 30.000        | 0.406         | 5        | 4.934        | 0.007        | Yes       |
| 30.000 vs. 50.000        | 1.638         | 5        | 19.929       | <0.001       | Yes       |
| 30.000 vs. 45.000        | 1.592         | 5        | 19.367       | <0.001       | Yes       |
| 30.000 vs. 40.000        | 0.932         | 5        | 11.336       | <0.001       | Yes       |
| 40.000 vs. 50.000        | 0.706         | 5        | 8.594        | <0.001       | Yes       |
| 40.000 vs. 45.000        | 0.660         | 5        | 8.032        | <0.001       | Yes       |
| <b>45.000 vs. 50.000</b> | <b>0.0462</b> | <b>5</b> | <b>0.562</b> | <b>0.995</b> | <b>No</b> |

Comparisons for factor: **temp within 15%PEG**

| Comparison               | Diff of Means | p        | q            | P            | P<0.050   |
|--------------------------|---------------|----------|--------------|--------------|-----------|
| 20.000 vs. 50.000        | 2.254         | 5        | 27.415       | <0.001       | Yes       |
| 20.000 vs. 45.000        | 1.828         | 5        | 22.242       | <0.001       | Yes       |
| 20.000 vs. 40.000        | 1.137         | 5        | 13.836       | <0.001       | Yes       |
| <b>20.000 vs. 30.000</b> | <b>0.190</b>  | <b>5</b> | <b>2.311</b> | <b>0.481</b> | <b>No</b> |
| 30.000 vs. 50.000        | 2.064         | 5        | 25.104       | <0.001       | Yes       |
| 30.000 vs. 45.000        | 1.638         | 5        | 19.932       | <0.001       | Yes       |
| 30.000 vs. 40.000        | 0.947         | 5        | 11.525       | <0.001       | Yes       |
| 40.000 vs. 50.000        | 1.116         | 5        | 13.579       | <0.001       | Yes       |
| 40.000 vs. 45.000        | 0.691         | 5        | 8.406        | <0.001       | Yes       |
| 45.000 vs. 50.000        | 0.425         | 5        | 5.173        | 0.004        | Yes       |

Comparisons for factor: **temp within 25%PEG**

| Comparison               | Diff of Means | p        | q            | P            | P<0.050   |
|--------------------------|---------------|----------|--------------|--------------|-----------|
| 20.000 vs. 50.000        | 2.541         | 5        | 30.911       | <0.001       | Yes       |
| 20.000 vs. 45.000        | 1.828         | 5        | 22.232       | <0.001       | Yes       |
| 20.000 vs. 40.000        | 0.573         | 5        | 6.969        | <0.001       | Yes       |
| 20.000 vs. 30.000        | 0.374         | 5        | 4.546        | 0.016        | Yes       |
| 30.000 vs. 50.000        | 2.167         | 5        | 26.365       | <0.001       | Yes       |
| 30.000 vs. 45.000        | 1.454         | 5        | 17.686       | <0.001       | Yes       |
| <b>30.000 vs. 40.000</b> | <b>0.199</b>  | <b>5</b> | <b>2.423</b> | <b>0.432</b> | <b>No</b> |
| 40.000 vs. 50.000        | 1.968         | 5        | 23.942       | <0.001       | Yes       |
| 40.000 vs. 45.000        | 1.255         | 5        | 15.263       | <0.001       | Yes       |
| 45.000 vs. 50.000        | 0.713         | 5        | 8.679        | <0.001       | Yes       |

Comparisons for factor: **temp within 35%PEG**

| Comparison               | Diff of Means | p        | q            | P            | P<0.050   |
|--------------------------|---------------|----------|--------------|--------------|-----------|
| 20.000 vs. 50.000        | 3.184         | 5        | 38.739       | <0.001       | Yes       |
| 20.000 vs. 45.000        | 2.193         | 5        | 26.679       | <0.001       | Yes       |
| 20.000 vs. 40.000        | 0.818         | 5        | 9.946        | <0.001       | Yes       |
| 20.000 vs. 30.000        | 0.693         | 5        | 8.435        | <0.001       | Yes       |
| 30.000 vs. 50.000        | 2.491         | 5        | 30.304       | <0.001       | Yes       |
| 30.000 vs. 45.000        | 1.500         | 5        | 18.243       | <0.001       | Yes       |
| <b>30.000 vs. 40.000</b> | <b>0.124</b>  | <b>5</b> | <b>1.511</b> | <b>0.822</b> | <b>No</b> |
| 40.000 vs. 50.000        | 2.367         | 5        | 28.793       | <0.001       | Yes       |
| 40.000 vs. 45.000        | 1.375         | 5        | 16.732       | <0.001       | Yes       |
| 45.000 vs. 50.000        | 0.991         | 5        | 12.061       | <0.001       | Yes       |

Comparisons for factor: **PEG within 20°C**

| Comparison               | Diff of Means | p        | q            | P            | P<0.050   |
|--------------------------|---------------|----------|--------------|--------------|-----------|
| 35.000 vs. 0.000         | 1.152         | 4        | 14.012       | <0.001       | Yes       |
| 35.000 vs. 15.000        | 0.936         | 4        | 11.392       | <0.001       | Yes       |
| 35.000 vs. 25.000        | 0.635         | 4        | 7.729        | <0.001       | Yes       |
| 25.000 vs. 0.000         | 0.517         | 4        | 6.283        | <0.001       | Yes       |
| <b>25.000 vs. 15.000</b> | <b>0.301</b>  | <b>4</b> | <b>3.664</b> | <b>0.054</b> | <b>No</b> |
| <b>15.000 vs. 0.000</b>  | <b>0.215</b>  | <b>4</b> | <b>2.620</b> | <b>0.257</b> | <b>No</b> |

Comparisons for factor: **PEG within 30°C**

| Comparison               | Diff of Means | p        | q            | P            | P<0.050   |
|--------------------------|---------------|----------|--------------|--------------|-----------|
| 35.000 vs. 0.000         | 0.864         | 4        | 10.511       | <0.001       | Yes       |
| 35.000 vs. 15.000        | 0.433         | 4        | 5.268        | 0.002        | Yes       |
| 35.000 vs. 25.000        | 0.316         | 4        | 3.839        | 0.040        | Yes       |
| 25.000 vs. 0.000         | 0.548         | 4        | 6.671        | <0.001       | Yes       |
| <b>25.000 vs. 15.000</b> | <b>0.117</b>  | <b>4</b> | <b>1.428</b> | <b>0.744</b> | <b>No</b> |
| 15.000 vs. 0.000         | 0.431         | 4        | 5.243        | 0.002        | Yes       |

Comparisons for factor: **PEG within 40°C**

| Comparison        | Diff of Means | p | q      | P      | P<0.050 |
|-------------------|---------------|---|--------|--------|---------|
| 35.000 vs. 0.000  | 1.672         | 4 | 20.336 | <0.001 | Yes     |
| 35.000 vs. 15.000 | 1.256         | 4 | 15.282 | <0.001 | Yes     |
| 35.000 vs. 25.000 | 0.391         | 4 | 4.751  | 0.007  | Yes     |
| 25.000 vs. 0.000  | 1.281         | 4 | 15.584 | <0.001 | Yes     |
| 25.000 vs. 15.000 | 0.866         | 4 | 10.531 | <0.001 | Yes     |
| 15.000 vs. 0.000  | 0.415         | 4 | 5.053  | 0.003  | Yes     |

Comparisons for factor: **PEG within 45°C**

| Comparison               | Diff of Means | p        | q            | P            | P<0.050   |
|--------------------------|---------------|----------|--------------|--------------|-----------|
| 35.000 vs. 0.000         | 0.956         | 4        | 11.635       | <0.001       | Yes       |
| 35.000 vs. 15.000        | 0.572         | 4        | 6.956        | <0.001       | Yes       |
| <b>35.000 vs. 25.000</b> | <b>0.270</b>  | <b>4</b> | <b>3.282</b> | <b>0.102</b> | <b>No</b> |
| 25.000 vs. 0.000         | 0.687         | 4        | 8.353        | <0.001       | Yes       |
| 25.000 vs. 15.000        | 0.302         | 4        | 3.674        | 0.053        | No        |
| 15.000 vs. 0.000         | 0.385         | 4        | 4.679        | 0.008        | Yes       |

Comparisons for factor: **PEG within 50°C**

| Comparison              | Diff of Means | p        | q            | P            | P<0.050     |
|-------------------------|---------------|----------|--------------|--------------|-------------|
| <b>25.000 vs. 0.000</b> | <b>0.0194</b> | <b>4</b> | <b>0.236</b> | <b>0.998</b> | <b>No</b>   |
| 25.000 vs. 15.000       | 0.0138        | 4        | 0.168        | 0.999        | Do Not Test |
| 25.000 vs. 35.000       | 0.00820       | 4        | 0.0998       | 1.000        | Do Not Test |
| 35.000 vs. 0.000        | 0.0112        | 4        | 0.136        | 1.000        | Do Not Test |
| 35.000 vs. 15.000       | 0.00560       | 4        | 0.0681       | 1.000        | Do Not Test |
| 15.000 vs. 0.000        | 0.00560       | 4        | 0.0681       | 1.000        | Do Not Test |

A result of "Do Not Test" occurs for a comparison when no significant difference is found between two means that enclose that comparison. For example, if you had four means sorted in order, and found no difference between means 4 vs. 2, then you would not test 4 vs. 3 and 3 vs. 2, but still test 4 vs. 1 and 3 vs. 1 (4 vs. 3 and 3 vs. 2 are enclosed by 4 vs. 2: 4 3 2 1). Note that not testing the enclosed means is a procedural rule, and a result of Do Not Test should be treated as if there is no significant difference between the means, even though one may appear to exist.

**STATISTICAL ANALYSIS (ANOVA + TEST DE TUKEY) “for percentages”**

All Pairwise Multiple Comparison Procedures (Tukey Test):

Comparisons for factor: **PEG**

| Comparison               | Diff of Means | p        | q            | P            | P<0.050   |
|--------------------------|---------------|----------|--------------|--------------|-----------|
| 25.000 vs. 0.000         | 14.200        | 4        | 12.833       | <0.001       | Yes       |
| 25.000 vs. 15.000        | 5.800         | 4        | 5.242        | 0.004        | Yes       |
| <b>25.000 vs. 35.000</b> | <b>1.663</b>  | <b>4</b> | <b>1.503</b> | <b>0.714</b> | <b>No</b> |
| 35.000 vs. 0.000         | 12.537        | 4        | 11.330       | <0.001       | Yes       |
| <b>35.000 vs. 15.000</b> | <b>4.137</b>  | <b>4</b> | <b>3.738</b> | <b>0.055</b> | <b>No</b> |
| 15.000 vs. 0.000         | 8.400         | 4        | 7.591        | <0.001       | Yes       |

Comparisons for factor: **Temp**

| Comparison        | Diff of Means | p | q      | P      | P<0.050 |
|-------------------|---------------|---|--------|--------|---------|
| 20.000 vs. 50.000 | 96.079        | 5 | 77.663 | <0.001 | Yes     |
| 20.000 vs. 45.000 | 77.000        | 5 | 62.241 | <0.001 | Yes     |
| 20.000 vs. 40.000 | 39.500        | 5 | 31.929 | <0.001 | Yes     |
| 20.000 vs. 30.000 | 15.500        | 5 | 12.529 | <0.001 | Yes     |
| 30.000 vs. 50.000 | 80.579        | 5 | 65.134 | <0.001 | Yes     |
| 30.000 vs. 45.000 | 61.500        | 5 | 49.712 | <0.001 | Yes     |
| 30.000 vs. 40.000 | 24.000        | 5 | 19.400 | <0.001 | Yes     |
| 40.000 vs. 50.000 | 56.579        | 5 | 45.734 | <0.001 | Yes     |
| 40.000 vs. 45.000 | 37.500        | 5 | 30.312 | <0.001 | Yes     |
| 45.000 vs. 50.000 | 19.079        | 5 | 15.422 | <0.001 | Yes     |

Comparisons for factor: **Temp within 0%PEG**

| Comparison               | Diff of Means | p        | q            | P                | P<0.050    |
|--------------------------|---------------|----------|--------------|------------------|------------|
| 20.000 vs. 50.000        | 96.000        | 5        | 38.799       | <0.001           | Yes        |
| 20.000 vs. 45.000        | 94.000        | 5        | 37.991       | <0.001           | Yes        |
| 20.000 vs. 40.000        | 63.000        | 5        | 25.462       | <0.001           | Yes        |
| <b>20.000 vs. 30.000</b> | <b>19.000</b> | <b>5</b> | <b>7.679</b> | <b>&lt;0.001</b> | <b>Yes</b> |
| 30.000 vs. 50.000        | 77.000        | 5        | 31.120       | <0.001           | Yes        |
| 30.000 vs. 45.000        | 75.000        | 5        | 30.312       | <0.001           | Yes        |
| 30.000 vs. 40.000        | 44.000        | 5        | 17.783       | <0.001           | Yes        |
| 40.000 vs. 50.000        | 33.000        | 5        | 13.337       | <0.001           | Yes        |
| 40.000 vs. 45.000        | 31.000        | 5        | 12.529       | <0.001           | Yes        |
| 45.000 vs. 50.000        | 2.000         | 5        | 0.808        | 0.979            | No         |

Comparisons for factor: **Temp within 15%PEG**

| Comparison               | Diff of Means | p        | q            | P            | P<0.050   |
|--------------------------|---------------|----------|--------------|--------------|-----------|
| 20.000 vs. 50.000        | 96.000        | 5        | 38.799       | <0.001       | Yes       |
| 20.000 vs. 45.000        | 78.000        | 5        | 31.525       | <0.001       | Yes       |
| 20.000 vs. 40.000        | 48.000        | 5        | 19.400       | <0.001       | Yes       |
| <b>20.000 vs. 30.000</b> | <b>8.000</b>  | <b>5</b> | <b>3.233</b> | <b>0.171</b> | <b>No</b> |
| 30.000 vs. 50.000        | 88.000        | 5        | 35.566       | <0.001       | Yes       |
| 30.000 vs. 45.000        | 70.000        | 5        | 28.291       | <0.001       | Yes       |
| 30.000 vs. 40.000        | 40.000        | 5        | 16.166       | <0.001       | Yes       |
| 40.000 vs. 50.000        | 48.000        | 5        | 19.400       | <0.001       | Yes       |
| 40.000 vs. 45.000        | 30.000        | 5        | 12.125       | <0.001       | Yes       |
| 45.000 vs. 50.000        | 18.000        | 5        | 7.275        | <0.001       | Yes       |

Comparisons for factor: **Temp within 25%PEG**

| Comparison        | Diff of Means | p | q      | P      | P<0.050 |
|-------------------|---------------|---|--------|--------|---------|
| 20.000 vs. 50.000 | 96.000        | 5 | 38.799 | <0.001 | Yes     |
| 20.000 vs. 45.000 | 69.000        | 5 | 27.887 | <0.001 | Yes     |

|                          |               |          |              |              |            |
|--------------------------|---------------|----------|--------------|--------------|------------|
| 20.000 vs. 40.000        | 22.000        | 5        | 8.892        | <0.001       | Yes        |
| <b>20.000 vs. 30.000</b> | <b>14.000</b> | <b>5</b> | <b>5.658</b> | <b>0.002</b> | <b>Yes</b> |
| 30.000 vs. 50.000        | 82.000        | 5        | 33.141       | <0.001       | Yes        |
| 30.000 vs. 45.000        | 55.000        | 5        | 22.229       | <0.001       | Yes        |
| <b>30.000 vs. 40.000</b> | <b>8.000</b>  | <b>5</b> | <b>3.233</b> | <b>0.171</b> | <b>No</b>  |
| 40.000 vs. 50.000        | 74.000        | 5        | 29.908       | <0.001       | Yes        |
| 40.000 vs. 45.000        | 47.000        | 5        | 18.996       | <0.001       | Yes        |
| 45.000 vs. 50.000        | 27.000        | 5        | 10.912       | <0.001       | Yes        |

Comparisons for factor: **Temp within 35%PEG**

| Comparison               | Diff of Means | p        | q            | P                | P<0.050    |
|--------------------------|---------------|----------|--------------|------------------|------------|
| 20.000 vs. 50.000        | 96.317        | 5        | 38.927       | <0.001           | Yes        |
| 20.000 vs. 45.000        | 67.000        | 5        | 27.079       | <0.001           | Yes        |
| 20.000 vs. 40.000        | 25.000        | 5        | 10.104       | <0.001           | Yes        |
| <b>20.000 vs. 30.000</b> | <b>21.000</b> | <b>5</b> | <b>8.487</b> | <b>&lt;0.001</b> | <b>Yes</b> |
| 30.000 vs. 50.000        | 75.317        | 5        | 30.440       | <0.001           | Yes        |
| 30.000 vs. 45.000        | 46.000        | 5        | 18.591       | <0.001           | Yes        |
| <b>30.000 vs. 40.000</b> | <b>4.000</b>  | <b>5</b> | <b>1.617</b> | <b>0.783</b>     | <b>No</b>  |
| 40.000 vs. 50.000        | 71.317        | 5        | 28.823       | <0.001           | Yes        |
| 40.000 vs. 45.000        | 42.000        | 5        | 16.975       | <0.001           | Yes        |
| 45.000 vs. 50.000        | 29.317        | 5        | 11.849       | <0.001           | Yes        |

Comparisons for factor: **PEG within 20°C** (correspond to the control; 100%)

| Comparison        | Diff of Means | p | q     | P     | P<0.050     |
|-------------------|---------------|---|-------|-------|-------------|
| 0.000 vs. 35.000  | 0.000         | 4 | 0.000 | 1.000 | No          |
| 0.000 vs. 25.000  | 0.000         | 4 | 0.000 | 1.000 | Do Not Test |
| 0.000 vs. 15.000  | 0.000         | 4 | 0.000 | 1.000 | Do Not Test |
| 15.000 vs. 35.000 | 0.000         | 4 | 0.000 | 1.000 | Do Not Test |
| 15.000 vs. 25.000 | 0.000         | 4 | 0.000 | 1.000 | Do Not Test |
| 25.000 vs. 35.000 | 0.000         | 4 | 0.000 | 1.000 | Do Not Test |

Comparisons for factor: **PEG within 30°C**

| Comparison               | Diff of Means | p        | q            | P            | P<0.050     |
|--------------------------|---------------|----------|--------------|--------------|-------------|
| 15.000 vs. 35.000        | 13.000        | 4        | 5.254        | 0.003        | Yes         |
| 15.000 vs. 0.000         | 11.000        | 4        | 4.446        | 0.016        | Yes         |
| <b>15.000 vs. 25.000</b> | <b>6.000</b>  | <b>4</b> | <b>2.425</b> | <b>0.330</b> | <b>No</b>   |
| <b>25.000 vs. 35.000</b> | <b>7.000</b>  | <b>4</b> | <b>2.829</b> | <b>0.205</b> | <b>No</b>   |
| 25.000 vs. 0.000         | 5.000         | 4        | 2.021        | 0.489        | Do Not Test |
| 0.000 vs. 35.000         | 2.000         | 4        | 0.808        | 0.940        | Do Not Test |

Comparisons for factor: **PEG within 40°C**

| Comparison               | Diff of Means | p        | q            | P            | P<0.050   |
|--------------------------|---------------|----------|--------------|--------------|-----------|
| 25.000 vs. 0.000         | 41.000        | 4        | 16.571       | <0.001       | Yes       |
| 25.000 vs. 15.000        | 26.000        | 4        | 10.508       | <0.001       | Yes       |
| <b>25.000 vs. 35.000</b> | <b>3.000</b>  | <b>4</b> | <b>1.212</b> | <b>0.827</b> | <b>No</b> |
| 35.000 vs. 0.000         | 38.000        | 4        | 15.358       | <0.001       | Yes       |
| 35.000 vs. 15.000        | 23.000        | 4        | 9.296        | <0.001       | Yes       |
| 15.000 vs. 0.000         | 15.000        | 4        | 6.062        | <0.001       | Yes       |

Comparisons for factor: **PEG within 45°C**

| Comparison               | Diff of Means | p        | q            | P            | P<0.050   |
|--------------------------|---------------|----------|--------------|--------------|-----------|
| 35.000 vs. 0.000         | 27.000        | 4        | 10.912       | <0.001       | Yes       |
| 35.000 vs. 15.000        | 11.000        | 4        | 4.446        | 0.016        | Yes       |
| <b>35.000 vs. 25.000</b> | <b>2.000</b>  | <b>4</b> | <b>0.808</b> | <b>0.940</b> | <b>No</b> |

|                          |              |          |              |              |           |
|--------------------------|--------------|----------|--------------|--------------|-----------|
| 25.000 vs. 0.000         | 25.000       | 4        | 10.104       | <0.001       | Yes       |
| <b>25.000 vs. 15.000</b> | <b>9.000</b> | <b>4</b> | <b>3.637</b> | <b>0.064</b> | <b>No</b> |
| 15.000 vs. 0.000         | 16.000       | 4        | 6.467        | <0.001       | Yes       |

Comparisons for factor: **PEG within 50°C**

| <b>Comparison</b>       | <b>Diff of Means</b> | <b>p</b> | <b>q</b>     | <b>P</b>     | <b>P&lt;0.050</b> |
|-------------------------|----------------------|----------|--------------|--------------|-------------------|
| <b>0.000 vs. 35.000</b> | <b>0.317</b>         | <b>4</b> | <b>0.128</b> | <b>1.000</b> | <b>No</b>         |
| 0.000 vs. 25.000        | 4.441E-016           | 4        | 1.795E-016   | 1.000        | Do Not Test       |
| 0.000 vs. 15.000        | 0.000                | 4        | 0.000        | 1.000        | Do Not Test       |
| 15.000 vs. 35.000       | 0.317                | 4        | 0.128        | 1.000        | Do Not Test       |
| 15.000 vs. 25.000       | 4.441E-016           | 4        | 1.795E-016   | 1.000        | Do Not Test       |
| 25.000 vs. 35.000       | 0.317                | 4        | 0.128        | 1.000        | Do Not Test       |

A result of "Do Not Test" occurs for a comparison when no significant difference is found between two means that enclose that comparison. For example, if you had four means sorted in order, and found no difference between means 4 vs. 2, then you would not test 4 vs. 3 and 3 vs. 2, but still test 4 vs. 1 and 3 vs. 1 (4 vs. 3 and 3 vs. 2 are enclosed by 4 vs. 2: 4 3 2 1). Note that not testing the enclosed means is a procedural rule, and a result of Do Not Test should be treated as if there is no significant difference between the means, even though one may appear to exist.

**Fig.3.** Effect of PEG<sub>6000</sub> on the thermal inactivation kinetics of  $\beta$ -Gal.**Raw data**

| Time (min) | Catalytic activity ( $\mu\text{M}\cdot\text{min}^{-1}$ )<br>(Preincubation at 30°C, PEG 0%) |          |          |       |        |
|------------|---------------------------------------------------------------------------------------------|----------|----------|-------|--------|
|            | Sample 1                                                                                    | Sample 2 | Sample 3 | Media | s.e.m. |
| 0          | 3.65                                                                                        | 3.94     | 3.98     | 3.85  | 0.102  |
| 10         | 3.36                                                                                        | 3.93     | 3.93     | 3.74  | 0.189  |
| 20         | 3.06                                                                                        | 3.49     | 4.01     | 3.52  | 0.275  |
| 30         | 3.18                                                                                        | 3.82     | 3.85     | 3.62  | 0.217  |
| 40         | 3.23                                                                                        | 3.51     | 3.39     | 3.38  | 0.081  |
| 50         | 2.92                                                                                        | 3.26     | 3.23     | 3.14  | 0.110  |
| 60         | 2.89                                                                                        | 3.55     | 3.17     | 3.20  | 0.192  |
| 70         | 2.91                                                                                        | 2.98     | 2.92     | 2.94  | 0.229  |
| 80         | 3.10                                                                                        | 3.30     | 3.29     | 3.23  | 0.630  |

| Time (min) | Catalytic activity ( $\mu\text{M}\cdot\text{min}^{-1}$ )<br>(Preincubation at 30°C, PEG 25%) |          |          |       |        |
|------------|----------------------------------------------------------------------------------------------|----------|----------|-------|--------|
|            | Sample 1                                                                                     | Sample 2 | Sample 3 | Media | s.e.m. |
| 0          | 5.94                                                                                         | 4.90     | 5.64     | 5.50  | 0.309  |
| 10         | 5.80                                                                                         | 6.17     | 6.28     | 6.08  | 0.145  |
| 20         | 7.12                                                                                         | 5.37     | 5.19     | 5.90  | 0.616  |
| 30         | 5.47                                                                                         | 5.75     | 5.43     | 5.55  | 0.100  |
| 40         | 5.82                                                                                         | 5.89     | 6.24     | 5.99  | 0.128  |
| 50         | 5.75                                                                                         | 5.69     | 5.45     | 5.63  | 0.928  |
| 60         | 4.96                                                                                         | 5.71     | 5.80     | 5.49  | 0.267  |
| 70         | 6.52                                                                                         | 5.11     | 5.54     | 5.73  | 0.417  |
| 80         | 5.42                                                                                         | 5.38     | 5.93     | 5.58  | 0.176  |

| Time (min) | Catalytic activity ( $\mu\text{M}.\text{min}^{-1}$ )<br>(Preincubation at 45°C, PEG 0%) |          |          |       |         |
|------------|-----------------------------------------------------------------------------------------|----------|----------|-------|---------|
|            | Sample 1                                                                                | Sample 2 | Sample 3 | Media | s.e.m.  |
| 0          | 2.06                                                                                    | 2.04     | 2.07     | 2.06  | 0.00705 |
| 10         | 0.495                                                                                   | 0.452    | 0.623    | 0.524 | 0.0512  |
| 20         | 0.47                                                                                    | 0.408    | 0.434    | 0.437 | 0.0178  |
| 30         | 0.439                                                                                   | 0.366    | 0.388    | 0.398 | 0.0217  |
| 40         | 0.452                                                                                   | 0.546    | 0.366    | 0.454 | 0.0521  |
| 50         | 0.366                                                                                   | 0.36     | 0.373    | 0.366 | 0.00371 |
| 60         | 0.408                                                                                   | 0.387    | 0.37     | 0.388 | 0.0109  |
| 70         | 0.369                                                                                   | 0.36     | 0.401    | 0.377 | 0.0124  |
| 80         | 0.388                                                                                   | 0.359    | 0.375    | 0.374 | 0.00826 |

| Time (min) | Catalytic activity ( $\mu\text{M}.\text{min}^{-1}$ )<br>(Preincubation at 45°C, PEG 25%) |          |          |       |        |
|------------|------------------------------------------------------------------------------------------|----------|----------|-------|--------|
|            | Sample 1                                                                                 | Sample 2 | Sample 3 | Media | s.e.m. |
| 0          | 2.65                                                                                     | 3.83     | 3.21     | 3.23  | 0.34   |
| 10         | 1.71                                                                                     | 1.8      | 1.71     | 1.74  | 0.0275 |
| 20         | 1.36                                                                                     | 1.33     | 0.878    | 1.19  | 0.156  |
| 30         | 1.06                                                                                     | 1.03     | 1.11     | 1.07  | 0.0249 |
| 40         | 0.827                                                                                    | 0.864    | 0.907    | 0.866 | 0.0232 |
| 50         | 0.758                                                                                    | 0.884    | 0.723    | 0.789 | 0.049  |
| 60         | 0.801                                                                                    | 0.636    | 0.639    | 0.692 | 0.0547 |
| 70         | 0.541                                                                                    | 0.527    | 0.578    | 0.549 | 0.0152 |
| 80         | 0.44                                                                                     | 0.476    | 0.448    | 0.455 | 0.0109 |

## Two Way Analysis of Variance

**Data source:** Data 1 in Fig 3 paper K lactis.JNB  
Balanced Design

**Dependent Variable:** 0%PEG 30°C

**Equal Variance Test:** Passed (P = 0.567)

| Source of Variation | DF | SS     | MS     | F       | P      |
|---------------------|----|--------|--------|---------|--------|
| Time                | 8  | 1.965  | 0.246  | 1.421   | 0.221  |
| PEG %               | 1  | 72.153 | 72.153 | 417.484 | <0.001 |
| Time x PEG %        | 8  | 1.427  | 0.178  | 1.032   | 0.431  |
| Residual            | 36 | 6.222  | 0.173  |         |        |
| Total               | 53 | 81.766 | 1.543  |         |        |

The difference in the mean values among the different levels of Time is not great enough to exclude the possibility that the difference is just due to random sampling variability after allowing for the effects of differences in PEG %. There is not a statistically significant difference (P = 0.221).

The difference in the mean values among the different levels of PEG % is greater than would be expected by chance after allowing for effects of differences in Time. There is a statistically significant difference ( $P = <0.001$ ). To isolate which group(s) differ from the others use a multiple comparison procedure.

The effect of different levels of Time does not depend on what level of PEG % is present. There is not a statistically significant interaction between Time and PEG %. ( $P = 0.431$ )

Power of performed test with  $\alpha = 0.0500$ : for Time : 0.168

Power of performed test with  $\alpha = 0.0500$ : for PEG % : 1.000

Power of performed test with  $\alpha = 0.0500$ : for Time x PEG % : 0.0567

Least square means for Time :

| Group  | Mean  |
|--------|-------|
| 0.000  | 4.675 |
| 10.000 | 4.912 |
| 20.000 | 4.707 |
| 30.000 | 4.583 |
| 40.000 | 4.680 |
| 50.000 | 4.383 |
| 60.000 | 4.347 |
| 70.000 | 4.330 |
| 80.000 | 4.403 |

Std Err of LS Mean = 0.170

Least square means for PEG % :

| Group  | Mean  |
|--------|-------|
| 0.000  | 3.402 |
| 25.000 | 5.714 |

Std Err of LS Mean = 0.0800

Least square means for Time x PEG % :

| Group           | Mean  |
|-----------------|-------|
| 0.000 x 0.000   | 3.857 |
| 0.000 x 25.000  | 5.493 |
| 10.000 x 0.000  | 3.740 |
| 10.000 x 25.000 | 6.083 |
| 20.000 x 0.000  | 3.520 |
| 20.000 x 25.000 | 5.893 |
| 30.000 x 0.000  | 3.617 |
| 30.000 x 25.000 | 5.550 |
| 40.000 x 0.000  | 3.377 |
| 40.000 x 25.000 | 5.983 |
| 50.000 x 0.000  | 3.137 |
| 50.000 x 25.000 | 5.630 |
| 60.000 x 0.000  | 3.203 |
| 60.000 x 25.000 | 5.490 |
| 70.000 x 0.000  | 2.937 |
| 70.000 x 25.000 | 5.723 |
| 80.000 x 0.000  | 3.230 |
| 80.000 x 25.000 | 5.577 |

Std Err of LS Mean = 0.240

All Pairwise Multiple Comparison Procedures (Tukey Test):

Comparisons for factor: Time

| Comparison        | Diff of Means | p | q     | P     | P<0.050     |
|-------------------|---------------|---|-------|-------|-------------|
| 10.000 vs. 70.000 | 0.582         | 9 | 3.427 | 0.303 | No          |
| 10.000 vs. 60.000 | 0.565         | 9 | 3.329 | 0.339 | Do Not Test |

|                   |         |   |        |       |             |
|-------------------|---------|---|--------|-------|-------------|
| 10.000 vs. 50.000 | 0.528   | 9 | 3.113  | 0.426 | Do Not Test |
| 10.000 vs. 80.000 | 0.508   | 9 | 2.995  | 0.478 | Do Not Test |
| 10.000 vs. 30.000 | 0.328   | 9 | 1.935  | 0.902 | Do Not Test |
| 10.000 vs. 0.000  | 0.237   | 9 | 1.394  | 0.985 | Do Not Test |
| 10.000 vs. 40.000 | 0.232   | 9 | 1.365  | 0.987 | Do Not Test |
| 10.000 vs. 20.000 | 0.205   | 9 | 1.208  | 0.994 | Do Not Test |
| 20.000 vs. 70.000 | 0.377   | 9 | 2.219  | 0.815 | Do Not Test |
| 20.000 vs. 60.000 | 0.360   | 9 | 2.121  | 0.848 | Do Not Test |
| 20.000 vs. 50.000 | 0.323   | 9 | 1.905  | 0.910 | Do Not Test |
| 20.000 vs. 80.000 | 0.303   | 9 | 1.787  | 0.935 | Do Not Test |
| 20.000 vs. 30.000 | 0.123   | 9 | 0.727  | 1.000 | Do Not Test |
| 20.000 vs. 0.000  | 0.0317  | 9 | 0.187  | 1.000 | Do Not Test |
| 20.000 vs. 40.000 | 0.0267  | 9 | 0.157  | 1.000 | Do Not Test |
| 40.000 vs. 70.000 | 0.350   | 9 | 2.062  | 0.867 | Do Not Test |
| 40.000 vs. 60.000 | 0.333   | 9 | 1.964  | 0.895 | Do Not Test |
| 40.000 vs. 50.000 | 0.297   | 9 | 1.748  | 0.943 | Do Not Test |
| 40.000 vs. 80.000 | 0.277   | 9 | 1.630  | 0.961 | Do Not Test |
| 40.000 vs. 30.000 | 0.0967  | 9 | 0.570  | 1.000 | Do Not Test |
| 40.000 vs. 0.000  | 0.00500 | 9 | 0.0295 | 1.000 | Do Not Test |
| 0.000 vs. 70.000  | 0.345   | 9 | 2.033  | 0.876 | Do Not Test |
| 0.000 vs. 60.000  | 0.328   | 9 | 1.935  | 0.902 | Do Not Test |
| 0.000 vs. 50.000  | 0.292   | 9 | 1.719  | 0.948 | Do Not Test |
| 0.000 vs. 80.000  | 0.272   | 9 | 1.601  | 0.965 | Do Not Test |
| 0.000 vs. 30.000  | 0.0917  | 9 | 0.540  | 1.000 | Do Not Test |
| 30.000 vs. 70.000 | 0.253   | 9 | 1.493  | 0.977 | Do Not Test |
| 30.000 vs. 60.000 | 0.237   | 9 | 1.394  | 0.985 | Do Not Test |
| 30.000 vs. 50.000 | 0.200   | 9 | 1.178  | 0.995 | Do Not Test |
| 30.000 vs. 80.000 | 0.180   | 9 | 1.061  | 0.998 | Do Not Test |
| 80.000 vs. 70.000 | 0.0733  | 9 | 0.432  | 1.000 | Do Not Test |
| 80.000 vs. 60.000 | 0.0567  | 9 | 0.334  | 1.000 | Do Not Test |
| 80.000 vs. 50.000 | 0.0200  | 9 | 0.118  | 1.000 | Do Not Test |
| 50.000 vs. 70.000 | 0.0533  | 9 | 0.314  | 1.000 | Do Not Test |
| 50.000 vs. 60.000 | 0.0367  | 9 | 0.216  | 1.000 | Do Not Test |
| 60.000 vs. 70.000 | 0.0167  | 9 | 0.0982 | 1.000 | Do Not Test |

Comparisons for factor: **PEG %**

| Comparison       | Diff of Means | p | q      | P      | P<0.050 |
|------------------|---------------|---|--------|--------|---------|
| 25.000 vs. 0.000 | 2.312         | 2 | 28.896 | <0.001 | Yes     |

Comparisons for factor: **PEG % within 0**

| Comparison       | Diff of Means | p | q     | P      | P<0.05 |
|------------------|---------------|---|-------|--------|--------|
| 25.000 vs. 0.000 | 1.637         | 2 | 6.819 | <0.001 | Yes    |

Comparisons for factor: **PEG % within 10**

| Comparison       | Diff of Means | p | q     | P      | P<0.05 |
|------------------|---------------|---|-------|--------|--------|
| 25.000 vs. 0.000 | 2.343         | 2 | 9.763 | <0.001 | Yes    |

Comparisons for factor: **PEG % within 20**

| Comparison       | Diff of Means | p | q     | P      | P<0.05 |
|------------------|---------------|---|-------|--------|--------|
| 25.000 vs. 0.000 | 2.373         | 2 | 9.888 | <0.001 | Yes    |

Comparisons for factor: **PEG % within 30**

| Comparison       | Diff of Means | p | q     | P      | P<0.05 |
|------------------|---------------|---|-------|--------|--------|
| 25.000 vs. 0.000 | 1.933         | 2 | 8.055 | <0.001 | Yes    |

Comparisons for factor: **PEG % within 40**

| <b>Comparison</b> | <b>Diff of Means</b> | <b>p</b> | <b>q</b> | <b>P</b> | <b>P&lt;0.05</b> |
|-------------------|----------------------|----------|----------|----------|------------------|
| 25.000 vs. 0.000  | 2.607                | 2        | 10.860   | <0.001   | Yes              |

Comparisons for factor: **PEG % within 50**

| <b>Comparison</b> | <b>Diff of Means</b> | <b>p</b> | <b>q</b> | <b>P</b> | <b>P&lt;0.05</b> |
|-------------------|----------------------|----------|----------|----------|------------------|
| 25.000 vs. 0.000  | 2.493                | 2        | 10.388   | <0.001   | Yes              |

Comparisons for factor: **PEG % within 60**

| <b>Comparison</b> | <b>Diff of Means</b> | <b>p</b> | <b>q</b> | <b>P</b> | <b>P&lt;0.05</b> |
|-------------------|----------------------|----------|----------|----------|------------------|
| 25.000 vs. 0.000  | 2.287                | 2        | 9.527    | <0.001   | Yes              |

Comparisons for factor: **PEG % within 70**

| <b>Comparison</b> | <b>Diff of Means</b> | <b>p</b> | <b>q</b> | <b>P</b> | <b>P&lt;0.05</b> |
|-------------------|----------------------|----------|----------|----------|------------------|
| 25.000 vs. 0.000  | 2.787                | 2        | 11.610   | <0.001   | Yes              |

Comparisons for factor: **PEG % within 80**

| <b>Comparison</b> | <b>Diff of Means</b> | <b>p</b> | <b>q</b> | <b>P</b> | <b>P&lt;0.05</b> |
|-------------------|----------------------|----------|----------|----------|------------------|
| 25.000 vs. 0.000  | 2.347                | 2        | 9.777    | <0.001   | Yes              |

Comparisons for factor: **Time within 0% PEG**

| <b>Comparison</b>       | <b>Diff of Means</b> | <b>p</b> | <b>q</b>     | <b>P</b>     | <b>P&lt;0.05</b> |
|-------------------------|----------------------|----------|--------------|--------------|------------------|
| <b>0.000 vs. 70.000</b> | <b>0.920</b>         | <b>9</b> | <b>3.833</b> | <b>0.180</b> | <b>No</b>        |
| 0.000 vs. 50.000        | 0.720                | 9        | 3.000        | 0.476        | Do Not Test      |
| 0.000 vs. 60.000        | 0.653                | 9        | 2.722        | 0.602        | Do Not Test      |
| 0.000 vs. 80.000        | 0.627                | 9        | 2.611        | 0.653        | Do Not Test      |
| 0.000 vs. 40.000        | 0.480                | 9        | 2.000        | 0.885        | Do Not Test      |
| 0.000 vs. 20.000        | 0.337                | 9        | 1.403        | 0.984        | Do Not Test      |
| 0.000 vs. 30.000        | 0.240                | 9        | 1.000        | 0.998        | Do Not Test      |
| 0.000 vs. 10.000        | 0.117                | 9        | 0.486        | 1.000        | Do Not Test      |
| 10.000 vs. 70.000       | 0.803                | 9        | 3.347        | 0.332        | Do Not Test      |
| 10.000 vs. 50.000       | 0.603                | 9        | 2.514        | 0.696        | Do Not Test      |
| 10.000 vs. 60.000       | 0.537                | 9        | 2.236        | 0.808        | Do Not Test      |
| 10.000 vs. 80.000       | 0.510                | 9        | 2.125        | 0.847        | Do Not Test      |
| 10.000 vs. 40.000       | 0.363                | 9        | 1.514        | 0.975        | Do Not Test      |
| 10.000 vs. 20.000       | 0.220                | 9        | 0.917        | 0.999        | Do Not Test      |
| 10.000 vs. 30.000       | 0.123                | 9        | 0.514        | 1.000        | Do Not Test      |
| 30.000 vs. 70.000       | 0.680                | 9        | 2.833        | 0.551        | Do Not Test      |
| 30.000 vs. 50.000       | 0.480                | 9        | 2.000        | 0.885        | Do Not Test      |
| 30.000 vs. 60.000       | 0.413                | 9        | 1.722        | 0.947        | Do Not Test      |
| 30.000 vs. 80.000       | 0.387                | 9        | 1.611        | 0.964        | Do Not Test      |
| 30.000 vs. 40.000       | 0.240                | 9        | 1.000        | 0.998        | Do Not Test      |
| 30.000 vs. 20.000       | 0.0967               | 9        | 0.403        | 1.000        | Do Not Test      |
| 20.000 vs. 70.000       | 0.583                | 9        | 2.430        | 0.732        | Do Not Test      |
| 20.000 vs. 50.000       | 0.383                | 9        | 1.597        | 0.966        | Do Not Test      |
| 20.000 vs. 60.000       | 0.317                | 9        | 1.319        | 0.989        | Do Not Test      |
| 20.000 vs. 80.000       | 0.290                | 9        | 1.208        | 0.994        | Do Not Test      |
| 20.000 vs. 40.000       | 0.143                | 9        | 0.597        | 1.000        | Do Not Test      |
| 40.000 vs. 70.000       | 0.440                | 9        | 1.833        | 0.926        | Do Not Test      |
| 40.000 vs. 50.000       | 0.240                | 9        | 1.000        | 0.998        | Do Not Test      |
| 40.000 vs. 60.000       | 0.173                | 9        | 0.722        | 1.000        | Do Not Test      |
| 40.000 vs. 80.000       | 0.147                | 9        | 0.611        | 1.000        | Do Not Test      |

|                   |        |   |       |       |             |
|-------------------|--------|---|-------|-------|-------------|
| 80.000 vs. 70.000 | 0.293  | 9 | 1.222 | 0.994 | Do Not Test |
| 80.000 vs. 50.000 | 0.0933 | 9 | 0.389 | 1.000 | Do Not Test |
| 80.000 vs. 60.000 | 0.0267 | 9 | 0.111 | 1.000 | Do Not Test |
| 60.000 vs. 70.000 | 0.267  | 9 | 1.111 | 0.997 | Do Not Test |
| 60.000 vs. 50.000 | 0.0667 | 9 | 0.278 | 1.000 | Do Not Test |
| 50.000 vs. 70.000 | 0.200  | 9 | 0.833 | 1.000 | Do Not Test |

Comparisons for factor: **Time within 25% PEG**

| Comparison               | Diff of Means | p        | q            | P            | P<0.05      |
|--------------------------|---------------|----------|--------------|--------------|-------------|
| <b>10.000 vs. 60.000</b> | <b>0.593</b>  | <b>9</b> | <b>2.472</b> | <b>0.714</b> | <b>No</b>   |
| 10.000 vs. 0.000         | 0.590         | 9        | 2.458        | 0.720        | Do Not Test |
| 10.000 vs. 30.000        | 0.533         | 9        | 2.222        | 0.814        | Do Not Test |
| 10.000 vs. 80.000        | 0.507         | 9        | 2.111        | 0.852        | Do Not Test |
| 10.000 vs. 50.000        | 0.453         | 9        | 1.889        | 0.914        | Do Not Test |
| 10.000 vs. 70.000        | 0.360         | 9        | 1.500        | 0.976        | Do Not Test |
| 10.000 vs. 20.000        | 0.190         | 9        | 0.792        | 1.000        | Do Not Test |
| 10.000 vs. 40.000        | 0.1000        | 9        | 0.417        | 1.000        | Do Not Test |
| 40.000 vs. 60.000        | 0.493         | 9        | 2.055        | 0.869        | Do Not Test |
| 40.000 vs. 0.000         | 0.490         | 9        | 2.042        | 0.873        | Do Not Test |
| 40.000 vs. 30.000        | 0.433         | 9        | 1.805        | 0.932        | Do Not Test |
| 40.000 vs. 80.000        | 0.407         | 9        | 1.694        | 0.952        | Do Not Test |
| 40.000 vs. 50.000        | 0.353         | 9        | 1.472        | 0.979        | Do Not Test |
| 40.000 vs. 70.000        | 0.260         | 9        | 1.083        | 0.997        | Do Not Test |
| 40.000 vs. 20.000        | 0.0900        | 9        | 0.375        | 1.000        | Do Not Test |
| 20.000 vs. 60.000        | 0.403         | 9        | 1.680        | 0.954        | Do Not Test |
| 20.000 vs. 0.000         | 0.400         | 9        | 1.667        | 0.956        | Do Not Test |
| 20.000 vs. 30.000        | 0.343         | 9        | 1.430        | 0.982        | Do Not Test |
| 20.000 vs. 80.000        | 0.317         | 9        | 1.319        | 0.989        | Do Not Test |
| 20.000 vs. 50.000        | 0.263         | 9        | 1.097        | 0.997        | Do Not Test |
| 20.000 vs. 70.000        | 0.170         | 9        | 0.708        | 1.000        | Do Not Test |
| 70.000 vs. 60.000        | 0.233         | 9        | 0.972        | 0.999        | Do Not Test |
| 70.000 vs. 0.000         | 0.230         | 9        | 0.958        | 0.999        | Do Not Test |
| 70.000 vs. 30.000        | 0.173         | 9        | 0.722        | 1.000        | Do Not Test |
| 70.000 vs. 80.000        | 0.147         | 9        | 0.611        | 1.000        | Do Not Test |
| 70.000 vs. 50.000        | 0.0933        | 9        | 0.389        | 1.000        | Do Not Test |
| 50.000 vs. 60.000        | 0.140         | 9        | 0.583        | 1.000        | Do Not Test |
| 50.000 vs. 0.000         | 0.137         | 9        | 0.569        | 1.000        | Do Not Test |
| 50.000 vs. 30.000        | 0.0800        | 9        | 0.333        | 1.000        | Do Not Test |
| 50.000 vs. 80.000        | 0.0533        | 9        | 0.222        | 1.000        | Do Not Test |
| 80.000 vs. 60.000        | 0.0867        | 9        | 0.361        | 1.000        | Do Not Test |
| 80.000 vs. 0.000         | 0.0833        | 9        | 0.347        | 1.000        | Do Not Test |
| 80.000 vs. 30.000        | 0.0267        | 9        | 0.111        | 1.000        | Do Not Test |
| 30.000 vs. 60.000        | 0.0600        | 9        | 0.250        | 1.000        | Do Not Test |
| 30.000 vs. 0.000         | 0.0567        | 9        | 0.236        | 1.000        | Do Not Test |
| 0.000 vs. 60.000         | 0.00333       | 9        | 0.0139       | 1.000        | Do Not Test |

A result of "Do Not Test" occurs for a comparison when no significant difference is found between two means that enclose that comparison. For example, if you had four means sorted in order, and found no difference between means 4 vs. 2, then you would not test 4 vs. 3 and 3 vs. 2, but still test 4 vs. 1 and 3 vs. 1 (4 vs. 3 and 3 vs. 2 are enclosed by 4 vs. 2: 4 3 2 1). Note that not testing the enclosed means is a procedural rule, and a result of Do Not Test should be treated as if there is no significant difference between the means, even though one may appear to exist.

## References

- (1) Turina, A. V.; Sanchez, J. M.; Perillo, M. A. In *Localization of ortho-nitrophenol within the lipid bilayer*, Congreso Conjunto de Sociedades Biomédicas de la Argentina, Mar del Plata, Argentina, Medicina: Mar del Plata, Argentina, 2004; p 234.
- (2) Farruggia, B.; Nerli, B.; Picó, G., Study of the serum albumin-polyethyleneglycol interaction to predict the protein partitioning in aqueous two-phase systems. *Journal of Chromatography B* **2003**, 798 (1), 25-33.
- (3) Ferreira, L.; Fan, X.; Mikheeva, L. M.; Madeira, P. P.; Kurgan, L.; Uversky, V. N.; Zaslavsky, B. Y., Structural features important for differences in protein partitioning in aqueous dextran-olyethylene glycol two-phase systems of different ionic compositions. *Biochimica et Biophysica Acta (BBA) - Proteins and Proteomics* **2014**, 1844 (3), 694-704.
- (4) Hutzler, J. M.; Tracy, T. S., Atypical Kinetic Profiles in Drug Metabolism Reactions. *Drug Metabolism and Disposition* **2002**, 30 (4), 355-362.
